# Supplementary material for: Factors Associated with Prescription of Antimicrobial Drugs for Dogs and Cats, United Kingdom, 2014–2016
Source: PubMed Central journal article supplement (PMC7392421; doi:10.3201/eid2608.191786), 2020-08
Supplement: 19-1786-Techapp-s1.pdf [file 19-1786-Techapp-s1.pdf]

# Factors Associated with Prescription of Antimicrobial Drugs for Dogs and Cats, United Kingdom, 2014–2016

## Appendix

**Appendix Table 1.** Summary of antimicrobial agents authorised for use in dogs and/or cats in the United Kingdom. Information source: Veterinary Medicines Directorate (<https://www.vmd.defra.gov.uk/ProductInformationDatabase/>), accessed 1 April 2016.

| Antimicrobial class                            | Antimicrobial agent                                                  |
|------------------------------------------------|----------------------------------------------------------------------|
| Aminoglycoside                                 | Framycetin sulfate<br>Gentamicin<br>Neomycin<br>Streptomycin sulfate |
| Amphenicol                                     | Florfenicol                                                          |
| Beta-lactam                                    |                                                                      |
| <i>Amoxicillin</i>                             | Amoxicillin                                                          |
| <i>Ampicillin</i>                              | Ampicillin                                                           |
| <i>Clavulanic acid potentiated amoxicillin</i> | Amoxicillin-clavulanic acid                                          |
| <i>Cloxacillin</i>                             | Cloxacillin                                                          |
| <i>1st generation cephalosporin</i>            | Cefalexin                                                            |
| <i>3rd generation cephalosporin</i>            | Cefovecin                                                            |
| <i>Penicillin</i>                              | Benzathine benzyl penicillin                                         |
| <i>Penicillin</i>                              | Procaine benzylpenicillin                                            |
| Fluoroquinolone                                | Enrofloxacin<br>Orbifloxacin<br>Marbofloxacin<br>Pradofloxacin       |
| Fusidic acid                                   | Fusidic acid                                                         |
| Lincosamide                                    | Clindamycin<br>Lincomycin                                            |
| Nitroimidazole                                 | Metronidazole                                                        |
| Nitroimidazole-macrolide                       | Metronidazole-spiramycin                                             |
| Potentiated sulphonamide                       | Sulfadiazine-trimethoprim                                            |
| Polymyxin                                      | Polymyxin B sulfate                                                  |
| Tetracycline                                   | Doxycycline<br>Oxytetracycline                                       |

**Appendix Table 2.** Descriptive demographic summary of sick canine and feline consultations used for analyses of factors associated with antimicrobial prescription, focusing on the percentage of consultations contributed by a range of genetically similar breed groups, as defined by Vonholdt et al. (2010) for dog breeds, and Lipinski et al. (2008) for cat breeds.

| Breeds            | % of consultations (95% CI) | Breeds            | % of consultations (95% CI) |
|-------------------|-----------------------------|-------------------|-----------------------------|
| Dog breed group   |                             | Cat breed group   |                             |
| Ancient / spitz   | 1.3 (1.2–1.4)               | Asian             | 3.5 (3.3–3.8)               |
| Crossbreed        | 22.1 (21.4–22.8)            | Crossbreed        | 87.6 (86.3–88.8)            |
| Herding           | 4.7 (4.4–5.1)               | Mediterranean     | 0.1 (0.1–0.1)               |
| Mastiff-like      | 9.5 (9.1–9.9)               | West Europe       | 6.4 (5.3–7.5)               |
| Retriever         | 14.5 (13.8–15.2)            | Unclassified      | 2.5 (2.3–2.7)               |
| Scent hound       | 2.6 (2.5–2.8)               | Unknown / missing | 4.0 (3.1–4.8)               |
| Sight hound       | 1.6 (1.5–1.8)               |                   |                             |
| Small terriers    | 12.8 (12.4–13.2)            |                   |                             |
| Spaniel           | 13.7 (13.3–14.1)            |                   |                             |
| Toy               | 4.7 (4.4–5.0)               |                   |                             |
| Working dog       | 5.2 (5.0–5.4)               |                   |                             |
| Unclassified      | 11.3 (10.9–11.6)            |                   |                             |
| Unknown / missing | 1.2 (1.0–1.4)               |                   |                             |

**Appendix Table 3.** Descriptive summary of the percentage of total sick canine consultations where an animal was prescribed at least one antimicrobial (systemic, topical or systemic highest priority critically important (HPCIA) compared against animal breed, including breeds where in excess of 2,500 consultations were recorded\*

| Genetic breed group (1) | Dog breed                     | Systemic   |      | Topical   |      | Systemic HPCIA |     |         |
|-------------------------|-------------------------------|------------|------|-----------|------|----------------|-----|---------|
|                         |                               | n consults | %†   | 95% CI    | %    | 95% CI         | %   | 95% CI  |
| Crossbreed              | Crossbreed                    | 59,010     | 24.9 | 23.9–25.8 | 13.3 | 12.9–13.7      | 1.2 | 0.9–1.4 |
| Herding                 | Border collie                 | 9,821      | 26.7 | 25.2–28.2 | 8.1  | 7.5–8.7        | 1.0 | 0.6–1.5 |
|                         | Border terrier                | 5,225      | 24.3 | 22.6–26.1 | 16.0 | 14.7–17.3      | 1.4 | 0.9–1.8 |
| Mastiff-like            | Boxer                         | 4,780      | 22.6 | 21.0–24.2 | 17.7 | 16.4–19.1      | 0.7 | 0.4–0.9 |
|                         | Bulldog                       | 2,530      | 32.7 | 30.5–34.9 | 23.3 | 21.3–25.3      | 1.1 | 0.6–1.6 |
| Retriever               | Staffordshire bull terrier    | 9,719      | 24.8 | 23.6–26.0 | 15.6 | 14.8–16.5      | 0.7 | 0.5–1.0 |
|                         | Golden retriever              | 6,223      | 26.3 | 24.4–28.1 | 15.1 | 13.9–16.4      | 1.0 | 0.7–1.4 |
| Scent hound             | Labrador retriever            | 30,977     | 22.7 | 21.6–23.8 | 15.2 | 14.5–15.9      | 1.0 | 0.7–1.2 |
|                         | Dachshund                     | 3,065      | 25.1 | 22.7–27.4 | 9.6  | 8.4–10.9       | 2.7 | 1.8–3.5 |
| Small terrier           | Jack russell terrier          | 14,869     | 26.1 | 24.9–27.4 | 16.7 | 15.8–17.7      | 1.4 | 1.1–1.8 |
|                         | West highland white terrier   | 11,040     | 28.9 | 27.5–30.3 | 10.8 | 10.0–11.7      | 2.9 | 2.4–3.5 |
| Spaniel                 | Yorkshire terrier             | 6,328      | 27.6 | 25.9–29.2 | 11.0 | 10.4–11.6      | 3.2 | 2.6–3.8 |
|                         | Cavalier King Charles spaniel | 7,586      | 22.5 | 21.1–24.0 | 14.0 | 13.1–14.9      | 1.3 | 0.9–1.7 |
| Toy                     | Cocker spaniel                | 15,312     | 27.8 | 26.5–29.2 | 18.1 | 17.2–18.9      | 1.7 | 1.4–2.1 |
|                         | English springer spaniel      | 6,774      | 26.3 | 24.8–27.9 | 14.1 | 13.1–15.2      | 1.3 | 0.9–1.7 |
| Unclassified            | Springer spaniel              | 4,073      | 27.4 | 25.6–29.2 | 15.5 | 14.1–16.8      | 1.4 | 0.9–1.9 |
|                         | Chihuahua                     | 2,583      | 26.5 | 24.3–28.8 | 7.9  | 6.8–9.0        | 2.3 | 1.5–3.1 |
| Unknown                 | Pug                           | 2,679      | 24.7 | 22.6–26.7 | 21.5 | 19.9–23.1      | 1.8 | 1.1–2.4 |
|                         | Shih tzu                      | 5,938      | 23.4 | 21.8–25.0 | 17.3 | 16.2–18.5      | 2.0 | 1.6–2.5 |
| Working dog             | Bichon frise                  | 3,314      | 25.8 | 24.2–27.4 | 18.7 | 17.1–20.4      | 1.4 | 0.9–1.8 |
|                         | Lhasa apso                    | 3,060      | 26.5 | 24.3–28.7 | 17.3 | 15.5–19.1      | 2.4 | 1.7–3.1 |
| Unknown                 | Unknown                       | 3,182      | 24.3 | 22.5–26.1 | 12.1 | 10.8–13.3      | 0.9 | 0.5–1.3 |
|                         | German shepherd dog           | 6,695      | 28.4 | 27.0–29.8 | 13.5 | 12.5–14.4      | 1.1 | 0.7–1.6 |
|                         | Schnauzer                     | 3,376      | 27.2 | 25.2–29.1 | 12.3 | 11.0–13.5      | 1.2 | 0.7–1.8 |

\*HPCIA, Highest priority critically important antimicrobial.

**Appendix Table 4.** Descriptive summary of the percentage of total sick canine consultations prescribed a systemic antimicrobial. Also included are parameter estimates from a series of univariable mixed effect logistic regression models assessing the association between a range of animal, owner, practitioner and practice-related factors and the probability of prescribing a systemic antimicrobial. Random effects include animal, site, and practice\*

| Variable                   | Category                    | % of prescribing consults (95% CI) | $\beta$ | SE   | OR   | 95% CI    | P     |
|----------------------------|-----------------------------|------------------------------------|---------|------|------|-----------|-------|
| <b>Categorical factors</b> |                             |                                    |         |      |      |           |       |
| Country                    | England (Intercept)         | 25.7 (24.7–26.7)                   | -1.16   | 0.03 | 0.31 | 0.30–0.33 |       |
|                            | Scotland                    | 26.8 (24.9–28.7)                   | 0.04    | 0.05 | 1.04 | 0.94–1.16 | 0.45  |
|                            | Wales                       | 24.7 (22.3–27.1)                   | -0.02   | 0.07 | 0.98 | 0.86–1.12 | 0.76  |
| Main presenting complaint  | Gastroenteric (Intercept)   | 40.2 (41.0–44.8)                   | -0.46   | 0.03 | 0.63 | 0.59–0.67 |       |
|                            | Other unwell                | 22.0 (21.3–22.8)                   | -0.93   | 0.02 | 0.34 | 0.38–0.41 | <0.01 |
|                            | Kidney disease              | 30.1 (27.4–32.8)                   | -0.39   | 0.06 | 0.68 | 0.61–0.76 | <0.01 |
|                            | Pruritus                    | 27.0 (25.7–28.4)                   | -0.65   | 0.02 | 0.52 | 0.51–0.54 | <0.01 |
|                            | Respiratory                 | 42.9 (41.0–44.8)                   | 0.11    | 0.03 | 1.12 | 1.06–1.17 | <0.01 |
|                            | Trauma                      | 22.5 (21.5–23.6)                   | -0.86   | 0.02 | 0.42 | 0.41–0.44 | <0.01 |
| Sex                        | Tumour                      | 18.4 (17.5–19.3)                   | -1.17   | 0.03 | 0.31 | 0.30–0.33 | <0.01 |
|                            | Female (Intercept)          | 25.9 (24.9–26.8)                   | -1.15   | 0.03 | 0.32 | 0.30–0.33 |       |
|                            | Male                        | 25.6 (24.7–26.4)                   | -0.01   | 0.01 | 0.99 | 0.97–1.01 | 0.19  |
| Neuter status              | Un-neutered (Intercept)     | 27.4 (26.5–28.2)                   | -1.08   | 0.03 | 0.34 | 0.32–0.36 |       |
|                            | Neutered                    | 24.8 (24.0–25.7)                   | -0.12   | 0.01 | 0.89 | 0.87–0.91 | <0.01 |
| Microchip status           | Un-microchipped (Intercept) | 26.4 (25.5–27.3)                   | -1.14   | 0.03 | 0.32 | 0.30–0.34 |       |
|                            | Microchipped                | 25.2 (24.3–26.1)                   | -0.03   | 0.01 | 0.97 | 0.95–0.99 | 0.01  |
| Vaccination status         | Un-vaccinated (Intercept)   | 27.3 (26.4–28.2)                   | -1.10   | 0.03 | 0.33 | 0.32–0.35 |       |
|                            | Vaccinated                  | 25.1 (24.2–26.0)                   | -0.09   | 0.01 | 0.92 | 0.90–0.94 | <0.01 |
| Insurance status           | Un-insured (Intercept)      | 26.7 (25.9–27.6)                   | -1.11   | 0.03 | 0.33 | 0.31–0.35 |       |
|                            | Insured                     | 23.7 (22.7–24.7)                   | -0.14   | 0.01 | 0.87 | 0.85–0.89 | <0.01 |
| Owner urban status         | Urban (Intercept)           | 25.5 (24.5–26.4)                   | -1.16   | 0.03 | 0.31 | 0.30–0.33 |       |
|                            | Rural                       | 26.2 (25.0–27.3)                   | 0.01    | 0.01 | 1.01 | 0.98–1.03 | 0.71  |
| Genetic breed group (1)    | Retriever (Intercept)       | 23.4 (22.3–24.5)                   | -1.28   | 0.03 | 0.28 | 0.26–0.29 |       |
|                            | Crossbreed                  | 24.9 (23.9–25.8)                   | 0.08    | 0.02 | 1.08 | 1.05–1.12 | <0.01 |
|                            | Ancient / spitz             | 28.8 (26.7–30.8)                   | 0.27    | 0.05 | 1.32 | 1.20–1.44 | <0.01 |

| Variable                     | Category                     | % of prescribing<br>consults (95% CI) | $\beta$ | SE   | OR   | 95% CI    | P     |
|------------------------------|------------------------------|---------------------------------------|---------|------|------|-----------|-------|
|                              | Herding                      | 26.5 (25.2–27.8)                      | 0.14    | 0.03 | 1.15 | 1.09–1.22 | <0.01 |
|                              | Mastiff-like                 | 26.2 (25.2–27.1)                      | 0.16    | 0.02 | 1.17 | 1.12–1.22 | <0.01 |
|                              | Scent hound                  | 25.6 (24.0–27.1)                      | 0.13    | 0.04 | 1.13 | 1.06–1.21 | <0.01 |
|                              | Sight hound                  | 29.5 (27.6–31.5)                      | 0.30    | 0.04 | 1.35 | 1.25–1.47 | <0.01 |
|                              | Small terrier                | 27.3 (26.2–28.4)                      | 0.20    | 0.02 | 1.22 | 1.17–1.27 | <0.01 |
|                              | Spaniel                      | 26.5 (25.4–27.5)                      | 0.16    | 0.02 | 1.17 | 1.13–1.22 | <0.01 |
|                              | Toy                          | 24.7 (23.4–25.9)                      | 0.06    | 0.03 | 1.06 | 1.01–1.12 | 0.03  |
|                              | Unclassified                 | 26.0 (25.0–27.0)                      | 0.13    | 0.02 | 1.14 | 1.09–1.19 | <0.01 |
|                              | Unknown                      | 24.3 (22.6–26.1)                      | 0.12    | 0.05 | 1.13 | 1.03–1.24 | 0.01  |
|                              | Working dog                  | 27.4 (26.4–28.4)                      | 0.21    | 0.03 | 1.24 | 1.18–1.30 | <0.01 |
| Practice type                | Small animal (Intercept)     | 25.4 (24.3–26.4)                      | -1.19   | 0.03 | 0.31 | 0.29–0.32 |       |
|                              | Mixed                        | 26.6 (25.0–28.3)                      | 0.16    | 0.07 | 1.18 | 1.03–1.34 | 0.02  |
|                              | Small & equine               | 23.1 (20.2–25.9)                      | -0.04   | 0.15 | 0.96 | 0.71–1.30 | 0.79  |
|                              | Small & large                | 28.7 (26.2–31.2)                      | 0.16    | 0.14 | 1.17 | 0.89–1.55 | 0.27  |
| Accreditation                | Not accredited (Intercept)   | 28.4 (26.3–30.5)                      | -0.93   | 0.07 | 0.40 | 0.35–0.46 |       |
|                              | 1+ accredited site           | 25.2 (24.3–26.1)                      | -0.27   | 0.07 | 0.77 | 0.66–0.89 | <0.01 |
| Hospital status              | No hospital site (Intercept) | 26.2 (25.2–27.2)                      | -1.14   | 0.03 | 0.32 | 0.30–0.34 |       |
|                              | 1+ hospital site             | 23.9 (22.7–25.1)                      | -0.09   | 0.06 | 0.91 | 0.81–1.04 | 0.16  |
| Referral interest            | No (Intercept)               | 26.0 (25.1–26.9)                      | -1.12   | 0.03 | 0.33 | 0.31–0.35 |       |
|                              | Yes                          | 25.1 (23.2–26.9)                      | -0.11   | 0.05 | 0.89 | 0.80–0.99 | 0.04  |
| Employed RCVS AVP†           | None (Intercept)             | 26.3 (25.3–27.2)                      | -1.13   | 0.03 | 0.32 | 0.31–0.34 |       |
|                              | 1+ AVP                       | 24.0 (22.2–25.8)                      | -0.14   | 0.06 | 0.87 | 0.77–0.98 | 0.02  |
| Employed RCVS<br>specialist† | None (Intercept)             | 25.8 (25.0–26.7)                      | -1.15   | 0.03 | 0.32 | 0.30–0.33 |       |
|                              | 1+ specialist                | 22.0 (19.1–24.8)                      | -0.18   | 0.15 | 0.84 | 0.63–1.11 | 0.21  |
| Continuous factors           |                              |                                       |         |      |      |           |       |
| Age (years)                  | Intercept                    |                                       | -1.14   | 0.03 | 0.32 | 0.31–0.34 |       |
|                              | Age - linear                 |                                       | -0.10   | 0.01 | 0.90 | 0.88–0.92 | <0.01 |
|                              | Age - quadratic              |                                       | -0.03   | 0.01 | 0.97 | 0.96–0.99 | <0.01 |
|                              | Age - cubic                  |                                       | 0.02    | 0.01 | 1.02 | 1.02–1.03 | <0.01 |
| rIMD‡                        | Intercept                    |                                       | -1.16   | 0.03 | 0.31 | 0.30–0.33 |       |
|                              | rIMD                         |                                       | -0.02   | 0.01 | 0.98 | 0.97–1.00 | 0.04  |
| Dogs per household (2)       | Intercept                    |                                       | -1.16   | 0.03 | 0.31 | 0.30–0.33 |       |
|                              | Dogs per household           |                                       | -0.01   | 0.01 | 0.99 | 0.98–1.01 | 0.24  |
| Dogs per km <sup>2</sup> (2) | Intercept                    |                                       | -1.16   | 0.03 | 0.31 | 0.30–0.33 |       |
|                              | Dogs per km                  |                                       | -0.01   | 0.01 | 1.00 | 0.98–1.01 | 0.34  |

\*SE, standard error; OR, odds ratio.

†Royal College of Veterinary Surgeons (RCVS) Advanced Veterinary Practitioner (AVP) and / or specialist status.

‡Rescaled Indices of Multiple Deprivation (rIMD) quintile, 1 = most deprived.

**Appendix Table 5.** Descriptive summary of the percentage of total sick canine consultations prescribed a systemic highest priority critically important antimicrobial (HPCIA). Also included are parameter estimates from a series of univariable mixed effect logistic regression models assessing the association between a range of animal, owner, practitioner and practice-related factors and the probability of prescribing a systemic HPCIA. Random effects include animal, site, and practice\*

| Variable                     | Category                     | % of prescribing consults (95% CI) | $\beta$       | SE    | OR   | 95% CI    | P         |      |
|------------------------------|------------------------------|------------------------------------|---------------|-------|------|-----------|-----------|------|
| <b>Categorical factors</b>   |                              |                                    |               |       |      |           |           |      |
| Country                      | England (Intercept)          | 1.4 (1.2–1.7)                      | -4.80         | 0.07  | 0.01 | 0.01–0.01 | 1         |      |
|                              | Scotland                     | 1.4 (0.9–1.8)                      | -0.15         | 0.19  | 0.86 | 0.59–1.24 | 0.42      |      |
|                              | Wales                        | 1.1 (0.7–1.6)                      | -0.11         | 0.20  | 0.90 | 0.61–1.32 | 0.59      |      |
| Main presenting complaint    | Gastroenteric (Intercept)    | 1.7 (0.8–2.7)                      | -4.54         | 0.08  | 0.01 | 0.01–0.01 |           |      |
|                              | Kidney disease               | 2.2 (1.5–2.8)                      | 0.31          | 0.18  | 1.36 | 0.95–1.95 | 0.09      |      |
|                              | Other unwell                 | 1.5 (1.3–1.8)                      | -0.21         | 0.06  | 0.81 | 0.73–0.91 | <0.01     |      |
|                              | Pruritus                     | 1.6 (1.3–1.8)                      | -0.18         | 0.07  | 0.84 | 0.74–0.95 | <0.01     |      |
|                              | Respiratory                  | 2.8 (2.4–3.3)                      | 0.44          | 0.08  | 1.55 | 1.31–1.82 | <0.01     |      |
|                              | Trauma                       | 0.5 (0.4–0.7)                      | -1.13         | 0.08  | 0.32 | 0.27–0.38 | <0.01     |      |
|                              | Tumour                       | 0.8 (0.6–1.0)                      | -0.80         | 0.11  | 0.45 | 0.37–0.56 | <0.01     |      |
| Sex                          | Female (Intercept)           | 1.4 (1.2–1.7)                      | -4.80         | 0.07  | 0.01 | 0.01–0.01 |           |      |
|                              | Male                         | 1.4 (1.2–1.6)                      | -0.03         | 0.04  | 0.97 | 0.90–1.05 | 0.47      |      |
| Neuter status                | Un-neutered (Intercept)      | 1.4 (1.2–1.6)                      | -4.82         | 0.07  | 0.01 | 0.01–0.01 |           |      |
|                              | Neutered                     | 1.4 (1.2–1.7)                      | 0.00          | 0.04  | 1.00 | 0.92–1.09 | 0.94      |      |
| Microchip status             | Un-microchipped (Intercept)  | 1.5 (1.3–1.7)                      | -4.75         | 0.07  | 0.01 | 0.01–0.01 |           |      |
|                              | Microchipped                 | 1.4 (1.1–1.6)                      | -0.12         | 0.04  | 0.88 | 0.82–0.96 | <0.01     |      |
| Vaccination status           | Un-vaccinated (Intercept)    | 1.5 (1.3–1.7)                      | -4.73         | 0.07  | 0.01 | 0.01–0.01 |           |      |
|                              | Vaccinated                   | 1.4 (1.2–1.6)                      | -0.13         | 0.04  | 0.88 | 0.81–0.96 | <0.01     |      |
| Insurance status             | Un-insured (Intercept)       | 1.3 (1.1–1.6)                      | -4.86         | 0.07  | 0.01 | 0.01–0.01 |           |      |
|                              | Insured                      | 1.5 (1.3–1.8)                      | 0.13          | 0.04  | 1.13 | 1.04–1.23 | <0.01     |      |
| Owner urban status           | Urban (Intercept)            | 1.3 (1.1–1.5)                      | -4.83         | 0.07  | 0.01 | 0.01–0.01 |           |      |
|                              | Rural                        | 1.6 (1.3–2.0)                      | 0.03          | 0.05  | 1.04 | 0.95–1.14 | 0.49      |      |
| Genetic breed group (1)      | Retriever (Intercept)        | 1.0 (0.7–1.2)                      | -5.19         | 0.09  | 0.01 | 0.01–0.01 |           |      |
|                              | Crossbreed                   | 1.2 (0.9–1.4)                      | 0.06          | 0.22  | 1.07 | 0.69–1.64 | 0.78      |      |
|                              | Ancient / spitz              | 0.9 (0.5–1.3)                      | 0.24          | 0.08  | 1.27 | 1.09–1.47 | <0.01     |      |
|                              | Herding                      | 1.2 (0.7–1.6)                      | 0.08          | 0.12  | 1.09 | 0.86–1.37 | 0.50      |      |
|                              | Mastiff-like                 | 1.0 (0.8–1.1)                      | 0.09          | 0.10  | 1.09 | 0.90–1.33 | 0.37      |      |
|                              | Scent hound                  | 1.9 (1.4–2.4)                      | 0.67          | 0.13  | 1.95 | 1.52–2.51 | <0.01     |      |
|                              | Sight hound                  | 1.4 (0.9–1.8)                      | 0.34          | 0.17  | 1.41 | 1.01–1.97 | 0.04      |      |
|                              | Small terrier                | 2.3 (1.9–2.6)                      | 0.80          | 0.08  | 2.23 | 1.91–2.61 | <0.01     |      |
|                              | Spaniel                      | 1.5 (1.3–1.8)                      | 0.45          | 0.08  | 1.58 | 1.34–1.80 | <0.01     |      |
|                              | Toy                          | 2.2 (1.8–2.6)                      | 0.90          | 0.10  | 2.45 | 2.02–2.99 | <0.01     |      |
|                              | Unclassified                 | 1.5 (1.2–1.8)                      | 0.43          | 0.09  | 1.53 | 1.29–1.81 | <0.01     |      |
|                              | Unknown                      | 0.9 (0.5–1.3)                      | 0.18          | 0.22  | 1.20 | 0.77–1.85 | 0.43      |      |
|                              | Working dog                  | 1.4 (1.1–1.8)                      | 0.45          | 0.11  | 1.57 | 1.27–1.93 | <0.01     |      |
|                              | Practice type                | Small animal (Intercept)           | 1.3 (1.1–1.5) | -4.85 | 0.07 | 0.01      | 0.01–0.01 |      |
|                              |                              | Mixed                              | 1.7 (1.0–2.3) | 0.18  | 0.17 | 1.20      | 0.86–1.66 | 0.29 |
| Small & equine               |                              | 1.2 (0.7–1.6)                      | -0.10         | 0.40  | 0.91 | 0.42–1.98 | 0.80      |      |
| Small & large                |                              | 1.5 (1.0–1.9)                      | 0.08          | 0.35  | 1.09 | 0.55–2.15 | 0.81      |      |
| Not accredited (Intercept)   |                              | 1.7 (1.1–2.4)                      | -4.65         | 0.18  | 0.01 | 0.01–0.01 |           |      |
| Accreditation                | 1+ accredited site           | 1.4 (1.1–1.6)                      | -0.19         | 0.19  | 0.83 | 0.57–1.20 | 0.33      |      |
|                              | No hospital site (Intercept) | 1.5 (1.3–1.8)                      | -4.78         | 0.07  | 0.01 | 0.01–0.01 |           |      |
| Hospital status              | 1+ hospital site             | 1.0 (0.9–1.1)                      | -0.17         | 0.16  | 0.84 | 0.62–1.15 | 0.28      |      |
|                              | Referral interest            | No (Intercept)                     | 1.5 (1.2–1.7) | -4.80 | 0.08 | 0.01      | 0.01–0.01 |      |
| Employed RCVS AVP†           | Yes                          | 1.2 (1.0–1.5)                      | -0.06         | 0.14  | 0.94 | 0.72–1.23 | 0.66      |      |
|                              | None (Intercept)             | 1.5 (1.2–1.7)                      | -4.79         | 0.07  | 0.01 | 0.01–0.01 |           |      |
| Employed RCVS specialist†    | 1+ AVP                       | 1.3 (1.0–1.5)                      | -0.13         | 0.16  | 0.87 | 0.64–1.19 | 0.39      |      |
|                              | None (Intercept)             | 1.4 (1.2–1.6)                      | -4.81         | 0.06  | 0.01 | 0.01–0.01 |           |      |
|                              | 1+ specialist                | 0.8 (0.5–1.1)                      | -0.26         | 0.38  | 0.77 | 0.37–1.62 | 0.49      |      |
|                              | <b>Continuous factors</b>    |                                    |               |       |      |           |           |      |
| Age (years)                  | Intercept                    |                                    | -4.81         | 0.07  | 0.01 | 0.01–0.01 |           |      |
|                              | Age - linear                 |                                    | 0.20          | 0.04  | 1.22 | 1.13–1.32 | <0.01     |      |
|                              | Age - quadratic              |                                    | -0.03         | 0.03  | 0.97 | 0.93–1.02 | 0.23      |      |
|                              | Age - cubic                  |                                    | 0.04          | 0.02  | 1.04 | 1.01–1.08 | 0.01      |      |
| rIMD‡                        | Intercept                    |                                    | -4.82         | 0.06  | 0.01 | 0.01–0.01 |           |      |
|                              | rIMD                         |                                    | 0.02          | 0.02  | 1.02 | 0.97–1.07 | 0.39      |      |
| Dogs per household (2)       | Intercept                    |                                    | -4.82         | 0.06  | 0.01 | 0.01–0.01 |           |      |
|                              | Dogs per household           |                                    | 0.02          | 0.03  | 1.03 | 0.97–1.09 | 0.40      |      |
| Dogs per km <sup>2</sup> (2) | Intercept                    |                                    | -4.82         | 0.06  | 0.01 | 0.01–0.01 |           |      |
|                              | Dogs per km                  |                                    | -0.02         | 0.02  | 0.98 | 0.94–1.02 | 0.31      |      |

\*SE, standard error; OR, odds ratio.

†Royal College of Veterinary Surgeons (RCVS) Advanced Veterinary Practitioner (AVP) and / or specialist status.

‡Rescaled Indices of Multiple Deprivation (rIMD) quintile, 1 = most deprived.

**Appendix Table 6.** Descriptive summary of the percentage of total sick canine consultations prescribed a topical antimicrobial. Also included are parameter estimates from a series of univariable mixed effect logistic regression models assessing the association between a range of animal, owner, practitioner and practice-related factors and the probability of prescribing a topical antimicrobial. Random effects include animal, site, and practice\*

| Variable                     | Category                     | % of prescribing<br>consults (95% CI) | $\beta$ | SE   | OR    | 95% CI      | P     |
|------------------------------|------------------------------|---------------------------------------|---------|------|-------|-------------|-------|
| <b>Categorical factors</b>   |                              |                                       |         |      |       |             |       |
| Country                      | England (Intercept)          | 14.1 (13.9–14.6)                      | -1.82   | 0.02 | 0.16  | 0.16–0.17   |       |
|                              | Scotland                     | 13.4 (11.9–14.9)                      | 0.03    | 0.05 | 1.03  | 0.93–1.13   | 0.58  |
|                              | Wales                        | 14.7 (13.9–15.6)                      | -0.06   | 0.06 | 0.95  | 0.85–1.06   | 0.34  |
| Main presenting complaint    | Gastroenteric (Intercept)    | 1.8 (1.2–2.5)                         | -3.99   | 0.05 | 0.02  | 0.02–0.02   |       |
|                              | Kidney disease               | 3.2 (2.4–4.1)                         | 0.61    | 0.14 | 1.84  | 1.41–2.41   | <0.01 |
|                              | Other unwell                 | 15.5 (15.0–16.0)                      | 2.28    | 0.04 | 9.79  | 8.99–10.65  | <0.01 |
|                              | Pruritus                     | 31.7 (30.7–32.8)                      | 3.23    | 0.04 | 25.30 | 23.23–27.55 | <0.01 |
|                              | Respiratory                  | 2.9 (2.3–3.6)                         | 0.48    | 0.07 | 1.61  | 1.40–1.85   | <0.01 |
|                              | Trauma                       | 6.6 (6.2–7.0)                         | 1.32    | 0.05 | 3.75  | 3.43–4.11   | <0.01 |
|                              | Tumour                       | 5.9 (5.5–6.4)                         | 1.22    | 0.05 | 3.38  | 3.04–3.76   | <0.01 |
| Sex                          | Female (Intercept)           | 13.6 (13.3–14.0)                      | -1.87   | 0.02 | 0.15  | 0.15–0.16   |       |
|                              | Male                         | 14.8 (14.4–15.2)                      | 0.10    | 0.01 | 1.11  | 1.08–1.13   | <0.01 |
| Neuter status                | Un-neutered (Intercept)      | 15.0 (14.6–15.4)                      | -1.76   | 0.02 | 0.17  | 0.17–0.18   |       |
|                              | Neutered                     | 13.8 (13.4–14.2)                      | -0.10   | 0.01 | 0.91  | 0.88–0.93   | <0.01 |
| Microchip status             | Un-microchipped (Intercept)  | 13.4 (13.1–13.8)                      | -1.89   | 0.02 | 0.15  | 0.15–0.16   |       |
|                              | Microchipped                 | 14.9 (14.5–15.3)                      | 0.13    | 0.01 | 1.14  | 1.11–1.16   | <0.01 |
| Vaccination status           | Un-vaccinated (Intercept)    | 13.2 (12.9–13.6)                      | -1.90   | 0.02 | 0.15  | 0.14–0.16   |       |
|                              | Vaccinated                   | 14.6 (14.3–15.0)                      | 0.11    | 0.01 | 1.12  | 1.09–1.15   | <0.01 |
| Insurance status             | Un-insured (Intercept)       | 14.5 (14.2–14.9)                      | -1.80   | 0.02 | 0.17  | 0.16–0.17   |       |
|                              | Insured                      | 13.6 (13.2–14.1)                      | -0.07   | 0.01 | 0.93  | 0.91–0.96   | <0.01 |
| Owner urban status           | Urban (Intercept)            | 14.4 (14.0–14.8)                      | -1.81   | 0.02 | 0.16  | 0.16–0.17   |       |
|                              | Rural                        | 14.0 (13.6–14.4)                      | -0.04   | 0.02 | 0.97  | 0.94–1.00   | 0.02  |
| Genetic breed group (1)      | Retriever (Intercept)        | 15.3 (14.7–16.0)                      | -1.72   | 0.02 | 0.18  | 0.17–0.19   |       |
|                              | Crossbreed                   | 13.3 (12.9–13.7)                      | -0.01   | 0.06 | 0.99  | 0.89–1.11   | 0.92  |
|                              | Ancient / spitz              | 15.0 (13.5–16.5)                      | -0.16   | 0.02 | 0.85  | 0.82–0.89   | <0.01 |
|                              | Herding                      | 8.2 (7.7–8.7)                         | -0.70   | 0.04 | 0.50  | 0.46–0.54   | <0.01 |
|                              | Mastiff-like                 | 17.0 (16.4–17.6)                      | 0.11    | 0.03 | 1.11  | 1.06–1.17   | <0.01 |
|                              | Scent hound                  | 13.3 (12.2–14.3)                      | -0.18   | 0.04 | 0.83  | 0.77–0.91   | <0.01 |
|                              | Sight hound                  | 5.3 (4.4–6.2)                         | -1.17   | 0.07 | 0.31  | 0.27–0.36   | <0.01 |
|                              | Small terrier                | 12.8 (12.3–13.3)                      | -0.22   | 0.02 | 0.80  | 0.76–0.84   | <0.01 |
|                              | Spaniel                      | 16.1 (15.5–16.6)                      | 0.04    | 0.02 | 1.04  | 0.99–1.08   | 0.13  |
|                              | Toy                          | 15.5 (14.7–16.3)                      | -0.02   | 0.03 | 0.99  | 0.92–1.05   | 0.64  |
|                              | Unclassified                 | 15.5 (14.9–16.1)                      | 0.01    | 0.02 | 1.01  | 0.96–1.06   | 0.73  |
|                              | Unknown                      | 12.1 (10.8–13.4)                      | -0.29   | 0.06 | 0.75  | 0.66–0.85   | <0.01 |
|                              | Working dog                  | 13.7 (12.9–14.5)                      | -0.13   | 0.03 | 0.88  | 0.82–0.93   | <0.01 |
| Practice type                | Small animal (Intercept)     | 14.3 (13.9–14.8)                      | -1.81   | 0.02 | 0.16  | 0.16–0.17   |       |
|                              | Mixed                        | 13.6 (12.9–14.3)                      | -0.08   | 0.04 | 0.92  | 0.85–1.00   | 0.05  |
|                              | Small & equine               | 16.2 (14.3–18.2)                      | 0.17    | 0.09 | 1.19  | 0.99–1.42   | 0.06  |
|                              | Small & large                | 14.5 (13.6–15.4)                      | 0.00    | 0.09 | 1.00  | 0.84–1.2    | 0.99  |
| Accreditation                | Not accredited (Intercept)   | 13.3 (12.3–14.4)                      | -1.90   | 0.05 | 0.15  | 0.14–0.16   |       |
|                              | 1+ accredited site           | 14.4 (14.0–14.7)                      | 0.09    | 0.05 | 1.10  | 1.00–1.20   | 0.05  |
| Hospital status              | No hospital site (Intercept) | 14.0 (13.6–14.4)                      | -1.83   | 0.02 | 0.16  | 0.15–0.17   |       |
|                              | 1+ hospital site             | 15.0 (14.3–15.7)                      | 0.07    | 0.04 | 1.07  | 0.99–1.15   | 0.09  |
| Referral interest            | No (Intercept)               | 14.2 (13.9–14.6)                      | -1.83   | 0.02 | 0.16  | 0.16–0.17   |       |
|                              | Yes                          | 14.2 (13.5–15.0)                      | 0.03    | 0.03 | 1.03  | 0.96–1.10   | 0.47  |
| Employed RCVS AVP†           | None (Intercept)             | 13.9 (13.5–14.3)                      | -1.84   | 0.02 | 0.16  | 0.15–0.17   |       |
|                              | 1+ AVP                       | 15.3 (14.6–15.9)                      | 0.08    | 0.04 | 1.08  | 1.01–1.16   | 0.03  |
| Employed RCVS specialist‡    | None (Intercept)             | 14.3 (13.9–14.6)                      | -1.82   | 0.02 | 0.16  | 0.16–0.17   |       |
|                              | 1+ specialist                | 12.0 (10.2–13.7)                      | -0.18   | 0.09 | 0.84  | 0.70–1.00+  | 0.05  |
| <b>Continuous factors</b>    |                              |                                       |         |      |       |             |       |
| Age (years)                  | Intercept                    |                                       | -1.74   | 0.02 | 0.20  | 0.17–0.18   |       |
|                              | Age - linear                 |                                       | -0.32   | 0.01 | 0.73  | 0.71–0.75   | <0.01 |
|                              | Age - quadratic              |                                       | -0.12   | 0.01 | 0.89  | 0.88–0.90   | <0.01 |
|                              | Age - cubic                  |                                       | 0.03    | 0.01 | 1.03  | 1.02–1.04   | <0.01 |
| rIMD‡                        | Intercept                    |                                       | -1.82   | 0.02 | 0.16  | 0.16–0.17   | <0.01 |
|                              | rIMD                         |                                       | 0.01    | 0.01 | 1.01  | 0.99–1.02   | 0.32  |
| Dogs per household (2)       | Intercept                    |                                       | -1.82   | 0.02 | 0.16  | 0.16–0.17   |       |
|                              | Dogs per household           |                                       | -0.01   | 0.01 | 0.99  | 0.98–1.01   | 0.40  |
| Dogs per km <sup>2</sup> (2) | Intercept                    |                                       | -1.82   | 0.02 | 0.16  | 0.16–0.17   |       |
|                              | Dogs per km                  |                                       | 0.00    | 0.01 | 1.00  | 0.99–1.01   | 0.98  |

| Variable | Category | % of prescribing consultations (95% CI) | $\beta$ | SE | OR | 95% CI | P |
|----------|----------|-----------------------------------------|---------|----|----|--------|---|
|----------|----------|-----------------------------------------|---------|----|----|--------|---|

\*SE, standard error; OR, odds ratio.  
†Royal College of Veterinary Surgeons (RCVS) Advanced Veterinary Practitioner (AVP) and / or specialist status.  
‡Rescaled Indices of Multiple Deprivation (rIMD) quintile, 1 = most deprived.

**Appendix Table 7.** Descriptive summary of the percentage of total sick feline consultations where an animal was prescribed at least one antimicrobial (systemic, topical or systemic highest priority critically important (HPCIA) compared against animal breed, including breeds where in excess of 1,000 consultations were recorded\*

| Genetic breed group (3) | Cat breed  | Systemic   |      |           | Topical |          | Systemic HPCIA |           |
|-------------------------|------------|------------|------|-----------|---------|----------|----------------|-----------|
|                         |            | n consults | %†   | 95% CI    | %       | 95% CI   | %              | 95% CI    |
| Asian                   | Burmese    | 1,314      | 32.1 | 28.8–35.4 | 8.9     | 6.8–11.0 | 18.8           | 15.6–22.0 |
| Asian                   | Siamese    | 1,814      | 35.3 | 31.9–38.7 | 5.0     | 3.9–6.2  | 17.6           | 14.8–20.4 |
| Crossbreed              | Crossbreed | 93,599     | 32.9 | 31.9–33.8 | 5.7     | 5.5–5.9  | 17.2           | 16.1–18.4 |
| Unclassified            | Bengal     | 1,024      | 37.0 | 33.1–40.9 | 8.8     | 6.7–11.0 | 20.3           | 16.8–23.8 |
| Unknown                 | Unknown    | 4,244      | 34.0 | 32.4–35.6 | 7.4     | 6.5–8.3  | 18.0           | 15.6–20.3 |
| West Europe             | British    | 2,707      | 29.1 | 26.1–32.2 | 9.5     | 7.3–11.6 | 14.6           | 12.2–17.0 |
| West Europe             | Persian    | 1,870      | 29.9 | 26.6–33.2 | 11.0    | 9.3–12.7 | 16.1           | 13.4–18.8 |

\*HPCIA, highest priority critically important antimicrobial.

†Percentage of consultations where at least one antimicrobial was prescribed.

**Appendix Table 8.** Descriptive summary of the percentage of total sick feline consultations prescribed a systemic antimicrobial. Also included are parameter estimates from a series of univariable mixed effect logistic regression models assessing the association between a range of animal, owner, practitioner and practice-related factors and the probability of prescribing a systemic antimicrobial. Random effects include animal, site, and practice.

| Variable                   | Category                     | % of prescribing consultations (95% CI) <sup>a</sup> | $\beta$ | SE   | OR   | 95% CI    | P     |
|----------------------------|------------------------------|------------------------------------------------------|---------|------|------|-----------|-------|
| <b>Categorical factors</b> |                              |                                                      |         |      |      |           |       |
| Country                    | England (Intercept)          | 32.5 (31.5–33.5)                                     | –0.77   | 0.03 | 0.46 | 0.44–0.49 |       |
|                            | Scotland                     | 37.0 (33.9–40.1)                                     | 0.06    | 0.09 | 1.06 | 0.90–1.26 | 0.47  |
|                            | Wales                        | 33.4 (29.9–37.0)                                     | 0.34    | 0.10 | 1.40 | 1.15–1.71 | <0.01 |
| Main presenting complaint  | Gastroenteric (Intercept)    | 30.5 (28.1–32.9)                                     | –0.83   | 0.04 | 0.44 | 0.41–0.47 |       |
|                            | Kidney disease               | 20.7 (18.8–22.6)                                     | –0.47   | 0.05 | 0.62 | 0.56–0.69 | <0.01 |
|                            | Other unwell                 | 27.2 (26.1–28.2)                                     | –0.20   | 0.03 | 0.82 | 0.78–0.87 | <0.01 |
|                            | Pruritus                     | 26.8 (24.9–28.7)                                     | –0.23   | 0.03 | 0.79 | 0.74–0.85 | <0.01 |
|                            | Respiratory                  | 53.0 (50.6–55.4)                                     | 0.91    | 0.04 | 2.49 | 2.32–2.69 | <0.01 |
|                            | Trauma                       | 53.5 (52.3–54.7)                                     | 0.99    | 0.03 | 2.68 | 2.53–2.84 | <0.01 |
|                            | Tumour                       | 20.7 (19.0–22.3)                                     | –0.58   | 0.05 | 0.56 | 0.51–0.62 | <0.01 |
| Sex                        | Female (Intercept)           | 30.1 (29.1–31.1)                                     | –0.88   | 0.03 | 0.42 | 0.39–0.44 |       |
|                            | Male                         | 35.4 (34.4–36.4)                                     | 0.26    | 0.02 | 1.30 | 1.26–1.34 | <0.01 |
| Neuter status              | Un-neutered (Intercept)      | 33.1 (31.9–34.2)                                     | –0.74   | 0.03 | 0.48 | 0.45–0.51 |       |
|                            | Neutered                     | 32.8 (31.8–33.8)                                     | –0.00   | 0.02 | 1.00 | 0.96–1.04 | 0.87  |
| Microchip status           | Un-microchipped (Intercept)  | 32.2 (31.3–33.2)                                     | –0.80   | 0.03 | 0.45 | 0.43–0.48 |       |
|                            | Microchipped                 | 33.9 (32.8–35.1)                                     | 0.14    | 0.02 | 1.15 | 1.12–1.19 | <0.01 |
| Vaccination status         | Un-vaccinated (Intercept)    | 33.6 (32.6–34.6)                                     | –0.73   | 0.03 | 0.48 | 0.46–0.51 |       |
|                            | Vaccinated                   | 32.2 (31.2–33.2)                                     | –0.03   | 0.02 | 0.97 | 0.94–1.00 | 0.05  |
| Insurance status           | Un-insured (Intercept)       | 33.8 (32.8–34.8)                                     | –0.71   | 0.03 | 0.49 | 0.47–0.52 |       |
|                            | Insured                      | 28.9 (27.7–30.1)                                     | –0.20   | 0.02 | 0.82 | 0.79–0.86 | <0.01 |
| Owner urban status         | Urban (Intercept)            | 32.1 (31.1–33.1)                                     | –0.76   | 0.03 | 0.47 | 0.44–0.50 |       |
|                            | Rural                        | 34.8 (33.3–36.2)                                     | 0.04    | 0.02 | 1.05 | 1.00–1.09 | 0.04  |
| Genetic breed group (3)    | West Europe (Intercept)      | 30.8 (29.1–32.4)                                     | –0.88   | 0.04 | 0.41 | 0.38–0.45 |       |
|                            | Asian                        | 33.1 (30.7–35.5)                                     | 0.14    | 0.05 | 1.15 | 1.04–1.27 | 0.01  |
|                            | Crossbreed                   | 32.9 (31.9–33.8)                                     | 0.14    | 0.03 | 1.16 | 1.0–1.23  | <0.01 |
|                            | Mediterranean                | 42.5 (27.5–57.4)                                     | 0.48    | 0.26 | 1.61 | 0.97–2.67 | 0.06  |
|                            | Unclassified                 | 34.7 (32.2–37.3)                                     | 0.22    | 0.06 | 1.25 | 1.11–1.39 | <0.01 |
|                            | Unknown                      | 34.0 (32.4–35.6)                                     | 0.18    | 0.05 | 1.19 | 1.08–1.31 | <0.01 |
| Practice type              | Small animal (Intercept)     | 32.2 (31.1–33.2)                                     | –0.79   | 0.03 | 0.45 | 0.43–0.48 |       |
|                            | Mixed                        | 35.4 (32.8–38.0)                                     | 0.24    | 0.08 | 1.27 | 1.10–1.47 | <0.01 |
|                            | Small & equine               | 28.7 (22.4–35.0)                                     | –0.02   | 0.17 | 0.98 | 0.70–1.38 | 0.90  |
|                            | Small & large                | 37.7 (32.7–42.7)                                     | 0.25    | 0.16 | 1.29 | 0.94–1.76 | 0.11  |
| Accreditation              | Not accredited (Intercept)   | 36.4 (34.2–38.6)                                     | –0.54   | 0.08 | 0.58 | 0.50–0.68 |       |
|                            | 1+ accredited site           | 32.2 (31.2–33.2)                                     | –0.23   | 0.09 | 0.80 | 0.67–0.94 | <0.01 |
| Hospital status            | No hospital site (Intercept) | 33.3 (32.2–34.4)                                     | –0.72   | 0.03 | 0.49 | 0.46–0.52 |       |
|                            | 1+ hospital site             | 31.2 (29.5–32.9)                                     | –0.13   | 0.07 | 0.88 | 0.76–1.01 | 0.07  |
| Referral interest          | No (Intercept)               | 33.2 (32.1–34.3)                                     | –0.71   | 0.03 | 0.49 | 0.46–0.53 |       |
|                            | Yes                          | 31.9 (30.1–33.8)                                     | –0.11   | 0.06 | 0.90 | 0.79–1.01 | 0.08  |
| Employed RCVS AVP†         | None (Intercept)             | 33.4 (32.3–34.5)                                     | –0.71   | 0.03 | 0.49 | 0.46–0.53 |       |

|                              |                    |                  |       |      |      |           |       |
|------------------------------|--------------------|------------------|-------|------|------|-----------|-------|
| Employed RCVS specialist†    | 1+ AVP             | 31.3 (29.4–33.2) | -0.18 | 0.07 | 0.84 | 0.73–0.96 | 0.01  |
|                              | None (Intercept)   | 32.9 (32.0–33.9) | -0.74 | 0.03 | 0.48 | 0.45–0.51 |       |
|                              | 1+ specialist      | 29.0 (24.7–33.4) | -0.14 | 0.17 | 0.87 | 0.62–1.21 | 0.41  |
| Age (years)                  | Continuous factors |                  |       |      |      |           |       |
|                              | Intercept          |                  | -0.64 | 0.03 | 0.53 | 0.50–0.56 |       |
|                              | Age - linear       |                  | -0.53 | 0.02 | 0.59 | 0.57–0.61 | <0.01 |
|                              | Age - quadratic    |                  | -0.13 | 0.01 | 0.87 | 0.86–0.89 | <0.01 |
| rIMD †                       | Age - cubic        |                  | 0.12  | 0.01 | 1.13 | 1.11–1.15 | <0.01 |
|                              | Intercept          |                  | -0.74 | 0.03 | 0.48 | 0.45–0.50 |       |
|                              | IMD                |                  | -0.03 | 0.01 | 0.97 | 0.96–0.99 | <0.01 |
| Cats per household           | Intercept          |                  | -0.74 | 0.03 | 0.48 | 0.45–0.50 |       |
|                              | Cats per household |                  | -0.00 | 0.01 | 1.00 | 0.97–1.02 | 0.73  |
| Cats per km <sup>2</sup> (2) | Intercept          |                  | -0.74 | 0.03 | 0.48 | 0.45–0.50 |       |
|                              | Cats per km        |                  | -0.02 | 0.01 | 0.98 | 0.97–1.00 | 0.02  |

\*SE, standard error; OR, odds ratio.

†Royal College of Veterinary Surgeons (RCVS) Advanced Veterinary Practitioner (AVP) and / or specialist status.

‡Rescaled Indices of Multiple Deprivation (rIMD) quintile, 1 = most deprived.

**Appendix Table 9.** Descriptive summary of the percentage of total sick feline consultations prescribed a systemic highest priority critically important antimicrobial (HPCIA). Also included are parameter estimates from a series of univariable mixed effect logistic regression models assessing the association between a range of animal, owner, practitioner and practice-related factors and the probability of prescribing a systemic HPCIA. Random effects include animal, site, and practice.

| Variable                  | Category                     | % of prescribing consults (95% CI) | $\beta$ | SE   | OR   | 95% CI    | <i>P</i> |
|---------------------------|------------------------------|------------------------------------|---------|------|------|-----------|----------|
| Categorical factors       |                              |                                    |         |      |      |           |          |
| Country                   | England (Intercept)          | 17.1 (16.0–18.1)                   | -1.71   | 0.06 | 0.18 | 0.16–0.20 |          |
|                           | Scotland                     | 17.5 (9.8–25.3)                    | 0.07    | 0.12 | 1.07 | 0.86–1.35 | 0.54     |
|                           | Wales                        | 18.0 (14.9–21.1)                   | 0.18    | 0.17 | 1.20 | 0.86–1.68 | 0.29     |
| Main presenting complaint | Gastroenteric (Intercept)    | 6.9 (5.9–7.9)                      | -2.71   | 0.07 | 0.07 | 0.06–0.08 |          |
|                           | Kidney disease               | 13.7 (11.9–15.5)                   | 0.75    | 0.07 | 2.12 | 1.84–2.44 | <0.01    |
|                           | Other unwell                 | 14.2 (13.2–15.2)                   | 0.79    | 0.05 | 2.20 | 2.02–2.41 | <0.01    |
|                           | Pruritus                     | 19.8 (18.1–21.5)                   | 1.17    | 0.05 | 3.23 | 2.92–3.57 | <0.01    |
|                           | Respiratory                  | 29.4 (26.9–31.9)                   | 1.72    | 0.05 | 5.57 | 5.00–6.19 | <0.01    |
|                           | Trauma                       | 27.1 (24.6–29.5)                   | 1.68    | 0.05 | 5.35 | 4.88–5.87 | <0.01    |
|                           | Tumour                       | 12.3 (11.0–13.7)                   | 0.57    | 0.07 | 1.77 | 1.55–2.01 | <0.01    |
| Sex                       | Female (Intercept)           | 16.3 (15.2–17.4)                   | -1.76   | 0.06 | 0.17 | 0.15–0.19 |          |
|                           | Male                         | 17.9 (16.7–19.1)                   | 0.13    | 0.02 | 1.14 | 1.10–1.18 | <0.01    |
| Neuter status             | Un-neutered (Intercept)      | 16.3 (15.0–17.7)                   | -1.78   | 0.06 | 0.17 | 0.15–0.19 |          |
|                           | Neutered                     | 17.3 (16.2–18.4)                   | 0.10    | 0.03 | 1.11 | 1.06–1.16 | <0.01    |
| Microchip status          | Un-microchipped (Intercept)  | 16.8 (15.7–17.9)                   | -1.73   | 0.06 | 0.18 | 0.16–0.20 |          |
|                           | Microchipped                 | 17.6 (16.4–18.8)                   | 0.08    | 0.02 | 1.09 | 1.05–1.13 | <0.01    |
| Vaccination status        | Un-vaccinated (Intercept)    | 17.5 (16.3–18.7)                   | -1.67   | 0.06 | 0.19 | 0.17–0.21 |          |
|                           | Vaccinated                   | 16.8 (15.7–17.8)                   | -0.05   | 0.02 | 0.95 | 0.91–0.98 | <0.01    |
| Insurance status          | Un-insured (Intercept)       | 17.6 (16.5–18.8)                   | -1.67   | 0.06 | 0.19 | 0.17–0.21 |          |
|                           | Insured                      | 15.0 (13.7–16.2)                   | -0.13   | 0.03 | 0.88 | 0.84–0.93 | <0.01    |
| Owner urban status        | Urban (Intercept)            | 16.5 (15.4–17.6)                   | -1.71   | 0.06 | 0.18 | 0.16–0.20 |          |
|                           | Rural                        | 18.7 (16.9–20.5)                   | 0.06    | 0.03 | 1.06 | 1.01–1.11 | 0.03     |
| Genetic breed group (3)   | West Europe (Intercept)      | 15.3 (13.8–16.9)                   | -1.88   | 0.07 | 0.15 | 0.13–0.17 |          |
|                           | Asian                        | 17.2 (15.2–19.3)                   | 0.19    | 0.07 | 1.21 | 1.06–1.37 | <0.01    |
|                           | Crossbreed                   | 17.2 (16.1–18.3)                   | 0.20    | 0.04 | 1.23 | 1.13–1.33 | <0.01    |
|                           | Mediterranean                | 22.0 (7.1–36.9)                    | 0.11    | 0.32 | 1.12 | 0.60–2.09 | 0.73     |
|                           | Unclassified                 | 16.6 (14.7–18.6)                   | 0.15    | 0.07 | 1.16 | 1.01–1.34 | 0.04     |
|                           | Unknown                      | 18.0 (15.6–20.3)                   | 0.14    | 0.06 | 1.15 | 1.02–1.30 | 0.02     |
| Practice type             | Small animal (Intercept)     | 16.5 (15.3–17.8)                   | -1.73   | 0.06 | 0.18 | 0.16–0.20 |          |
|                           | Mixed                        | 18.8 (16.1–21.5)                   | 0.10    | 0.16 | 1.11 | 0.81–1.50 | 0.52     |
|                           | Small & equine               | 18.2 (12.7–23.7)                   | 0.27    | 0.37 | 1.30 | 0.64–2.67 | 0.47     |
|                           | Small & large                | 20.1 (14.4–25.9)                   | 0.28    | 0.32 | 1.32 | 0.71–2.46 | 0.38     |
| Accreditation             | Not accredited (Intercept)   | 14.5 (10.5–18.4)                   | -1.93   | 0.16 | 0.15 | 0.11–0.20 |          |
|                           | 1+ accredited site           | 17.7 (16.6–18.7)                   | 0.27    | 0.17 | 1.31 | 0.93–1.83 | 0.12     |
| Hospital status           | No hospital site (Intercept) | 17.0 (15.7–18.4)                   | -1.67   | 0.06 | 0.19 | 0.17–0.21 |          |
|                           | 1+ hospital site             | 17.4 (15.6–19.1)                   | -0.14   | 0.15 | 0.87 | 0.65–1.16 | 0.34     |
| Referral interest         | No (Intercept)               | 17.5 (16.1–18.8)                   | -1.67   | 0.07 | 0.19 | 0.17–0.22 |          |
|                           | Yes                          | 16.2 (14.3–18.2)                   | -0.08   | 0.12 | 0.92 | 0.72–1.17 | 0.50     |
| Employed RCVS AVP†        | None (Intercept)             | 17.3 (15.9–18.6)                   | -1.69   | 0.06 | 0.19 | 0.16–0.21 |          |
|                           | 1+ AVP                       | 16.8 (14.8–18.7)                   | -0.04   | 0.14 | 0.96 | 0.73–1.27 | 0.77     |

| Variable                     | Category           | % of prescribing<br>consults (95% CI) | $\beta$ | SE   | OR   | 95% CI    | P     |
|------------------------------|--------------------|---------------------------------------|---------|------|------|-----------|-------|
| Employed RCVS specialist†    | None (Intercept)   | 17.1 (16.0–18.2)                      | -1.70   | 0.06 | 0.18 | 0.16–0.21 |       |
|                              | 1+ specialist      | 16.5 (12.5–20.5)                      | 0.06    | 0.34 | 1.07 | 0.55–2.06 | 0.85  |
| Continuous factors           |                    |                                       |         |      |      |           |       |
| Age (years)                  | Intercept          |                                       | -1.51   | 0.06 | 0.22 | 0.20–0.25 |       |
|                              | Age - linear       |                                       | -0.38   | 0.02 | 0.68 | 0.66–0.71 | <0.01 |
|                              | Age - quadratic    |                                       | -0.20   | 0.01 | 0.82 | 0.80–0.83 | <0.01 |
|                              | Age - cubic        |                                       | 0.17    | 0.01 | 1.18 | 1.16–1.20 | <0.01 |
| rIMD‡                        | Intercept          |                                       | -1.69   | 0.06 | 0.18 | 0.17–0.21 |       |
|                              | IMD                |                                       | 0.00    | 0.01 | 1.00 | 0.98–1.03 | 0.83  |
| Cats per household (2)       | Intercept          |                                       | -1.69   | 0.06 | 0.18 | 0.17–0.21 |       |
|                              | Cats per household |                                       | 0.01    | 0.02 | 1.01 | 0.98–1.04 | 0.54  |
| Cats per km <sup>2</sup> (2) | Intercept          |                                       | -1.69   | 0.06 | 0.18 | 0.16–0.21 |       |
|                              | Cats per km        |                                       | -0.01   | 0.01 | 0.99 | 1.00–1.01 | 0.28  |

\*SE, standard error; OR, odds ratio.

†Royal College of Veterinary Surgeons (RCVS) Advanced Veterinary Practitioner (AVP) and / or specialist status.

‡Rescaled Indices of Multiple Deprivation (rIMD) quintile, 1 = most deprived.

**Appendix Table 10.** Descriptive summary of the percentage of total sick feline consultations prescribed a topical antimicrobial. Also included are parameter estimates from a series of univariable mixed effect logistic regression models assessing the association between a range of animal, owner, practitioner and practice-related factors and the probability of prescribing a topical antimicrobial. Random effects include animal, site, and practice.

| Variable                  | Category                    | % of prescribing<br>consults (95% CI) | $\beta$       | SE    | OR    | 95% CI     | P         |
|---------------------------|-----------------------------|---------------------------------------|---------------|-------|-------|------------|-----------|
| Categorical factors       |                             |                                       |               |       |       |            |           |
| Country                   | England (Intercept)         | 6.0 (5.8–6.3)                         | -2.77         | 0.02  | 0.06  | 0.06–0.07  |           |
|                           | Scotland                    | 6.6 (5.5–7.7)                         | 0.07          | 0.09  | 1.07  | 0.90–1.28  | 0.45      |
|                           | Wales                       | 6.6 (6.0–7.2)                         | 0.14          | 0.09  | 1.15  | 0.97–1.36  | 0.11      |
| Main presenting complaint | Gastroenteric (Intercept)   | 1.1 (0.6–1.6)                         | -4.47         | 0.10  | 0.01  | 0.01–0.01  |           |
|                           | Kidney disease              | 0.8 (0.5–1.1)                         | -0.34         | 0.23  | 0.72  | 0.46–1.11  | 0.14      |
|                           | Other unwell                | 7.1 (6.8–7.4)                         | 1.89          | 0.10  | 6.59  | 5.40–8.04  | <0.01     |
|                           | Pruritus                    | 10.8 (10.0–11.7)                      | 2.35          | 0.11  | 10.49 | 8.54–12.89 | <0.01     |
|                           | Respiratory                 | 5.7 (4.9–6.4)                         | 1.63          | 0.12  | 5.10  | 4.07–6.40  | <0.01     |
|                           | Trauma                      | 4.6 (4.3–5.0)                         | 1.43          | 0.11  | 4.20  | 3.41–5.17  | <0.01     |
|                           | Tumour                      | 1.7 (1.3–2.1)                         | 0.42          | 0.16  | 1.53  | 1.13–2.08  | 0.01      |
| Sex                       | Female (Intercept)          | 6.0 (5.7–6.2)                         | -2.78         | 0.03  | 0.06  | 0.06–0.07  |           |
|                           | Male                        | 6.2 (6.0–6.5)                         | 0.04          | 0.03  | 1.05  | 0.99–1.10  | 0.11      |
| Neuter status             | Un-neutered (Intercept)     | 7.3 (6.8–7.7)                         | -2.57         | 0.04  | 0.08  | 0.07–0.08  |           |
|                           | Neutered                    | 5.9 (5.6–6.1)                         | -0.23         | 0.03  | 0.79  | 0.74–0.85  | <0.01     |
| Microchip status          | Un-microchipped (Intercept) | 5.9 (5.7–6.2)                         | -2.79         | 0.03  | 0.06  | 0.06–0.07  |           |
|                           | Microchipped                | 6.4 (6.0–6.7)                         | 0.09          | 0.03  | 1.09  | 1.03–1.16  | <0.01     |
| Vaccination status        | Un-vaccinated (Intercept)   | 6.2 (5.9–6.5)                         | -2.74         | 0.03  | 0.06  | 0.06–0.07  |           |
|                           | Vaccinated                  | 6.0 (5.8–6.3)                         | -0.02         | 0.03  | 0.98  | 0.93–1.03  | 0.42      |
| Insurance status          | Un-insured (Intercept)      | 6.3 (6.1–6.5)                         | -2.72         | 0.02  | 0.07  | 0.06–0.07  |           |
|                           | Insured                     | 5.3 (4.9–5.8)                         | -0.19         | 0.04  | 0.83  | 0.77–0.89  | <0.01     |
| Owner urban status        | Urban (Intercept)           | 6.0 (5.8–6.3)                         | -2.77         | 0.03  | 0.06  | 0.06–0.07  |           |
|                           | Rural                       | 6.3 (5.9–6.7)                         | 0.04          | 0.03  | 1.04  | 0.97–1.11  | 0.26      |
| Genetic breed group (3)   | West Europe (Intercept)     | 9.5 (8.4–10.6)                        | -2.28         | 0.05  | 0.10  | 0.09–0.11  |           |
|                           | Asian                       | 6.9 (5.8–8.0)                         | -0.29         | 0.09  | 0.75  | 0.63–0.88  | <0.01     |
|                           | Crossbreed                  | 5.7 (5.5–5.9)                         | -0.54         | 0.05  | 0.58  | 0.53–0.64  | <0.01     |
|                           | Mediterranean               | 5.5 (0.5–10.4)                        | -0.47         | 0.49  | 0.62  | 0.24–1.64  | 0.34      |
|                           | Unclassified                | 8.3 (7.2–9.5)                         | -0.13         | 0.09  | 0.88  | 0.74–1.05  | 0.17      |
|                           | Unknown                     | 7.4 (6.4–8.3)                         | -0.29         | 0.08  | 0.75  | 0.64–0.88  | <0.01     |
| Practice type             | Small animal (Intercept)    | 6.0 (5.8–6.3)                         | -2.77         | 0.03  | 0.06  | 0.06–0.07  |           |
|                           | Mixed                       | 6.4 (5.9–7.0)                         | 0.07          | 0.06  | 1.08  | 0.96–1.21  | 0.20      |
|                           | Small & equine              | 5.7 (4.5–6.8)                         | -0.11         | 0.14  | 0.89  | 0.68–1.18  | 0.43      |
|                           | Small & large               | 6.4 (5.5–7.3)                         | 0.09          | 0.12  | 1.09  | 0.86–1.39  | 0.47      |
|                           | Not accredited (Intercept)  | 5.9 (5.2–6.5)                         | -2.77         | 0.06  | 0.06  | 0.06–0.07  |           |
| Accreditation             | 1+ accredited site          | 6.2 (5.9–6.4)                         | 0.02          | 0.07  | 1.02  | 0.90–1.16  | 0.74      |
|                           | Hospital status             | No hospital site (Intercept)          | 6.0 (5.7–6.2) | -2.76 | 0.03  | 0.06       | 0.06–0.07 |
| Referral interest         | 1+ hospital site            | 6.5 (6.1–6.9)                         | 0.04          | 0.06  | 1.05  | 0.94–1.16  | 0.42      |
|                           | No (Intercept)              | 6.0 (5.8–6.3)                         | -2.78         | 0.03  | 0.06  | 0.06–0.07  |           |
| Employed RCVS AVP†        | Yes                         | 6.3 (5.9–6.8)                         | 0.08          | 0.05  | 1.08  | 0.98–1.19  | 0.10      |
|                           | None (Intercept)            | 6.1 (5.9–6.4)                         | -2.75         | 0.03  | 0.06  | 0.06–0.07  |           |
|                           | 1+ AVP                      | 6.0 (5.6–6.4)                         | -0.03         | 0.05  | 0.97  | 0.87–1.08  | 0.57      |



|                              |                    |               |       |      |      |           |       |
|------------------------------|--------------------|---------------|-------|------|------|-----------|-------|
| Employed RCVS specialist†    | None (Intercept)   | 6.1 (5.9–6.3) | -2.75 | 0.02 | 0.06 | 0.06–0.07 | 0.36  |
|                              | 1+ specialist      | 5.3 (4.1–6.6) | -0.13 | 0.14 | 0.88 | 0.66–1.16 |       |
| Continuous factors           |                    |               |       |      |      |           |       |
| Age (years)                  | Intercept          |               | -2.86 | 0.03 | 0.06 | 0.05–0.06 |       |
|                              | Age - linear       |               | -0.29 | 0.03 | 0.75 | 0.70–0.79 | <0.01 |
|                              | Age - quadratic    |               | 0.04  | 0.02 | 1.04 | 1.01–1.08 | 0.01  |
|                              | Age - cubic        |               | -0.04 | 0.02 | 0.96 | 0.93–0.99 | 0.01  |
| rIMD‡                        | Intercept          |               | -2.76 | 0.02 | 0.06 | 0.06–0.07 |       |
|                              | IMD                |               | -0.04 | 0.02 | 0.96 | 0.93–0.99 | 0.01  |
| Cats per household (2)       | Intercept          |               | -2.75 | 0.02 | 0.06 | 0.06–0.07 |       |
|                              | Cats per household |               | 0.01  | 0.02 | 1.01 | 0.97–1.04 | 0.72  |
| Cats per km <sup>2</sup> (2) | Intercept          |               | -2.75 | 0.02 | 0.06 | 0.06–0.07 |       |
|                              | Cats per km        |               | 0.01  | 0.01 | 1.01 | 0.98–1.03 | 0.72  |

\*SE, standard error; OR, odds ratio.

†Royal College of Veterinary Surgeons (RCVS) Advanced Veterinary Practitioner (AVP) and / or specialist status.

‡Rescaled Indices of Multiple Deprivation (rIMD) quintile, 1 = most deprived.

## References

1. vonholdt BM, Pollinger JP, Lohmueller KE, Han E, Parker HG, Quignon P, et al. Genome-wide SNP and haplotype analyses reveal a rich history underlying dog domestication. *Nature*. 2010;464:898–902. [PubMed https://doi.org/10.1038/nature08837](https://doi.org/10.1038/nature08837)
2. Aegerter J, Fouracre D, Smith GC. A first estimate of the structure and density of the populations of pet cats and dogs across Great Britain. *PLoS One*. 2017;12:e0174709. [PubMed https://doi.org/10.1371/journal.pone.0174709](https://doi.org/10.1371/journal.pone.0174709)
3. Lipinski MJ, Froenicke L, Baysac KC, Billings NC, Leutenegger C, Levy AM, et al. The ascent of cat breeds: genetic evaluations of breeds and worldwide random-bred populations. *Genomics*. 2008;91:12–1. <https://doi.org/10.1016/j.ygeno.2007.10.009>
